# Supplementary material for: Total Delay in Treatment of Tuberculosis and Associated Factors among New Pulmonary TB Patients in Selected Health Facilities of Gedeo Zone, Southern Ethiopia, 2017/18
Source: Hindawi journal article supplement (doi:10.1155/2019/2154240), 2019-06-02
Supplement: f1 [file 2154240.f1.zip]

|     |                                                                                                                  |                                                                                                                                |  |
|-----|------------------------------------------------------------------------------------------------------------------|--------------------------------------------------------------------------------------------------------------------------------|--|
| 303 | Do you have visited other health facility prior to this health facilities contact?                               | 1. Yes<br>2. No                                                                                                                |  |
| 304 | What type of health facility do you consult first because current illness?                                       | 1. Government health care providers<br>2. Formal Private health care providers<br>3. Non- Formal Private health care providers |  |
| 305 | Number of health care provider visited until the current diagnosis made?                                         | _____                                                                                                                          |  |
| 305 | Did you seek any treatment (antibiotics) from somewhere else because of the first symptom before this diagnosis? | 1. Yes<br>2. No                                                                                                                |  |

## Part -IV: Estimation of delays

|     |                                                                                                                  |                                                 |  |
|-----|------------------------------------------------------------------------------------------------------------------|-------------------------------------------------|--|
| 401 | How long did you sick starting from onset of TB symptoms until first sought treatment in this health facilities? | _____ days     ( <i>Total Treatment delay</i> ) |  |
|-----|------------------------------------------------------------------------------------------------------------------|-------------------------------------------------|--|

## Part-V: Knowledge related factors

|     |                                                                                            |                                                                          |                                |  |
|-----|--------------------------------------------------------------------------------------------|--------------------------------------------------------------------------|--------------------------------|--|
| 501 | Do you know what TB is?                                                                    | 1. Yes                                                                   | 2. No                          |  |
| 502 | Do you think that TB a serious disease?                                                    | 1. Yes                                                                   | 2. No                          |  |
| 503 | What in your own opinion causes TB?                                                        | 1. Infection<br>3. Unavoidable<br>5. Others (specify)_____               | 2. Punishment<br>4. Don't know |  |
| 504 | What are the symptoms of someone infected with TB?                                         | 1. Cough for more than 2 weeks<br>2. Sputum with blood<br>4. Weight loss | 3. Fever<br>5. Don't know      |  |
| 505 | Do you believe that TB is caused by mycobacterium TB?                                      | 1. Yes                                                                   | 2. No                          |  |
| 506 | Do you think tuberculosis contagious?                                                      | 1. Yes                                                                   | 2. No                          |  |
| 507 | Do you believe that TB transmitted by air?                                                 | 1. Yes                                                                   | 2. No                          |  |
| 508 | Do you believed that TB is transmitted by hereditary?                                      | 1. Yes                                                                   | 2. No                          |  |
| 509 | Do you believe that keeping away from the infected individual can prevent TB transmission? | 1. Yes                                                                   | 2. No                          |  |
| 510 | Do you know how TB is diagnosed?                                                           | 1. Yes                                                                   | 2. No                          |  |
| 511 | If Q No. 610 Yes, how it diagnosis?                                                        | 1. Sputum examination<br>_____                                           | 2. X-ray 3. Other              |  |
| 512 | Do you know that TB is curable?                                                            | 1. Yes                                                                   | 2. No                          |  |
| 513 | Do you know what some cases of TB will require a longer treatment to be cured?             | 1. Yes                                                                   | 2. No                          |  |
| 514 | Do you know that TB treatment is free?                                                     | 1. Yes                                                                   | 2. No                          |  |
|     | <i>Knowledge scores</i>                                                                    | 1. Good                                                                  | 2. Poor                        |  |

| <b>Part-VI: Stigma related factors</b> (Please circle a score of 1= strongly disagree, 2= disagree, 3= agree, 4= strongly agree) to each questions.                                                                 |                                                                                                                                       |                                                  |   |   |   |
|---------------------------------------------------------------------------------------------------------------------------------------------------------------------------------------------------------------------|---------------------------------------------------------------------------------------------------------------------------------------|--------------------------------------------------|---|---|---|
| 601                                                                                                                                                                                                                 | Do you think TB patients should be helped with free medicine & transportation to access to the health facility?                       |                                                  |   |   |   |
| 602                                                                                                                                                                                                                 | Do you believe that people with TB disclose their illness to other people?                                                            | 1                                                | 2 | 3 | 4 |
| 603                                                                                                                                                                                                                 | Do you feel that TB can affect your relation with others such as families or friends?                                                 | 1                                                | 2 | 3 | 4 |
| 604                                                                                                                                                                                                                 | Do you feel alone after discovering that you have TB within the community?                                                            | 1                                                | 2 | 3 | 4 |
| 605                                                                                                                                                                                                                 | Do you feel ashamed of your TB disease?                                                                                               | 1                                                | 2 | 3 | 4 |
| 706                                                                                                                                                                                                                 | Have you been afraid you may lose your job if it is known you have TB?                                                                | 1                                                | 2 | 3 | 4 |
| 607                                                                                                                                                                                                                 | Do you think female are more discriminated against TB than male patients?                                                             | 1                                                | 2 | 3 | 4 |
| 608                                                                                                                                                                                                                 | Do you think that TB will affect the ability to become pregnant/ have healthy children in female?                                     | 1                                                | 2 | 3 | 4 |
| 609                                                                                                                                                                                                                 | Do you need permission from your family or relatives to access health services?                                                       | 1                                                | 2 | 3 | 4 |
| 610                                                                                                                                                                                                                 | Is there less chance of marriage due to TB diagnosis?                                                                                 | 1                                                | 2 | 3 | 4 |
| 611                                                                                                                                                                                                                 | <i>Stigma scores</i>                                                                                                                  | 1. No stigma/mild 2. Moderate<br>3. Sever stigma |   |   |   |
| <b>Part-VII: Patient Satisfaction/feedback</b> on health care providers & health care system on previous service (Please circle a score of 1= very low, 2= low, 3= medium, 4= good, 5= very good) to each questions |                                                                                                                                       |                                                  |   |   |   |
| 701                                                                                                                                                                                                                 | Are the health care providers supportive and respectful of people?                                                                    | 1                                                | 2 | 3 | 4 |
| 702                                                                                                                                                                                                                 | Before coming for diagnosis/ treatment, did you expect that the providers would be supportive and respectful to you?                  | 1                                                | 2 | 3 | 4 |
| 703                                                                                                                                                                                                                 | Do most people in your community believe they will be treated supportively and respectfully by health care providers if they have TB? | 1                                                | 2 | 3 | 4 |
| 704                                                                                                                                                                                                                 | Are you happy with the service you are getting from this facility?                                                                    | 1                                                | 2 | 3 | 4 |

|      |                                                                             |                           |   |   |   |   |  |
|------|-----------------------------------------------------------------------------|---------------------------|---|---|---|---|--|
| 705  | What Is the level of service you are getting from this facility?            | 1                         | 2 | 3 | 4 | 5 |  |
| 706  | Have health care workers answered all of your questions concerning illness? | 1                         | 2 | 3 | 4 | 5 |  |
| 707  | Are you satisfied with treatment received from other health workers?        | 1                         | 2 | 3 | 4 | 5 |  |
| 708  | Are you satisfied with clinic schedule?                                     |                           |   |   |   |   |  |
| 709  | Are you satisfied with waiting time in the clinic?                          | 1                         | 2 | 3 | 4 | 5 |  |
| 710  | Are you satisfied with cost of consultation?                                | 1                         | 2 | 3 | 4 | 5 |  |
| 711  | Are you satisfied with cost of treatment?                                   | 1                         | 2 | 3 | 4 | 5 |  |
| 8712 | Are you satisfied with availability of drugs at the health center?          | 1                         | 2 | 3 | 4 | 5 |  |
| 713  | Are you satisfied with you treatment partner/ DOTS supporter                | 1                         | 2 | 3 | 4 | 5 |  |
|      | <b><i>Patient Satisfaction score</i></b>                                    | 1. Good, 2. Medium 3. Low |   |   |   |   |  |
