# Supplementary material for: Total Delay in Treatment of Tuberculosis and Associated Factors among New Pulmonary TB Patients in Selected Health Facilities of Gedeo Zone, Southern Ethiopia, 2017/18
Source: Interdiscip Perspect Infect Dis. 2019 Jun 2;2019:2154240. doi: 10.1155/2019/2154240 (PMC6582841; doi:10.1155/2019/2154240)
Supplement: Supplementary Materials — Questionnaire to assessment of total delay in treatment of TB and associated factors among new pulmonary TB patients in selected health facilities of Gedeo Zone, Southern Ethiopia, 2017/1. [file 2154240.f1.zip]

Archive with 3 entries (2 files):
- 2154240/
- 2154240/Data collection tool_IPID_2761333.docx
- 2154240/Data collection tool_IPID_2761334.pdf
